# Supplementary material for: Genomic profile of MYCN non-amplified neuroblastoma and potential for immunotherapeutic strategies in neuroblastoma
Source: PubMed Central journal article supplement (PMC7653769; doi:10.1186/s12920-020-00819-5), 2020-11-10
Supplement: 12920_2020_819_MOESM1_ESM.pdf [file 12920_2020_819_MOESM1_ESM.pdf]

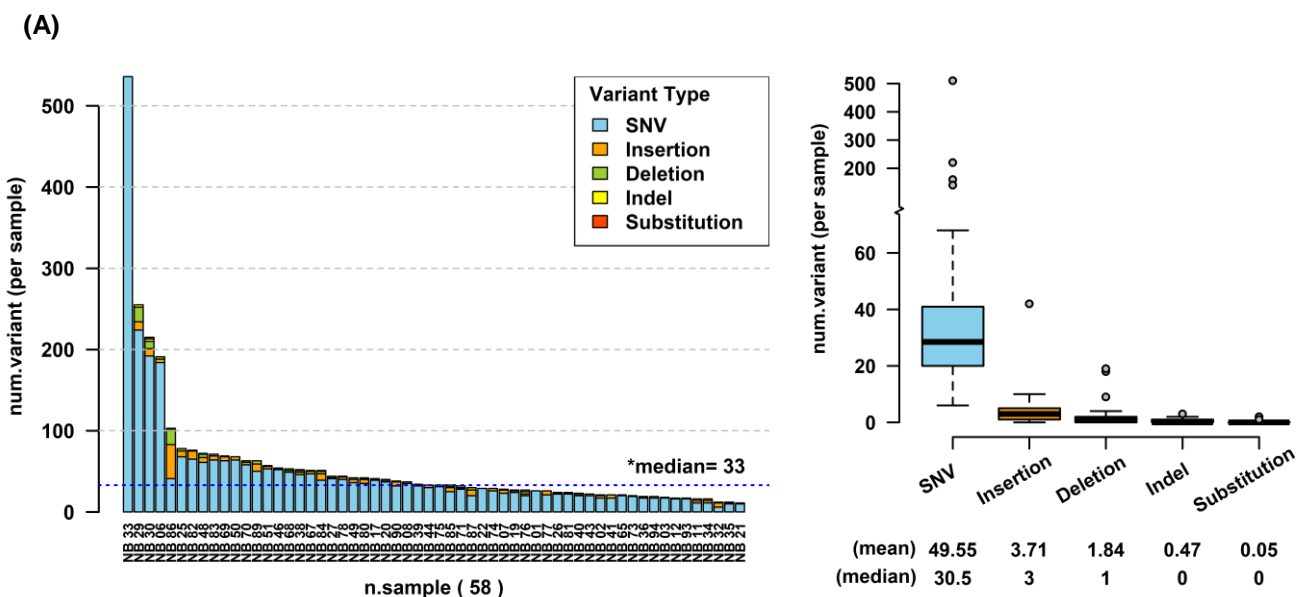

(B)

| frequency | n.gene | gene                                                                                                                                                                                                                                                        |
|-----------|--------|-------------------------------------------------------------------------------------------------------------------------------------------------------------------------------------------------------------------------------------------------------------|
| 15        | 1      | MUC4                                                                                                                                                                                                                                                        |
| 11        | 1      | RBMXL3                                                                                                                                                                                                                                                      |
| 10        | 1      | ALB                                                                                                                                                                                                                                                         |
| 8         | 2      | MUC16; SETD8                                                                                                                                                                                                                                                |
| 6         | 6      | AP1M1; MUC17; RP1L1; SLC25A5; TTN; ZNF717                                                                                                                                                                                                                   |
| 5         | 8      | CSMD1; DNHD1; PABPC1; PABPC3; PLIN4; RPL14; TTR; ZNF208                                                                                                                                                                                                     |
| 4         | 15     | APOA1; CTBP2; FAT4; FLG; FSIP2; GPRIN2; HP; KCNMB3; MUC5B; NOP16; OBSCN; PCLO; SKA3; U<br>SP6; ZBTB33                                                                                                                                                       |
| 3         | 36     | ABCA10; ABCA13; AHNAK; ALDOB; ALK; AMBP; APOH; C3; C5; CARM1; CELA1; EML5; FGG; GGT5;<br>GREB1L; HERC2; HLA-DRB1; HYDIN; KMT2D; LAMA5; LRCH4; MED13; MUC2; MUC3A; OR8U1; PCD<br>H11X; PDHA2; PEAR1; POLE; PRUNE2; RPS3A; SBF2; SLC22A2; STAB2; TANC1; TENM1 |
| 2         | 292    | (skip)                                                                                                                                                                                                                                                      |
| 1         | 2239   | (skip)                                                                                                                                                                                                                                                      |
| total     | 2601   | (skip)                                                                                                                                                                                                                                                      |

**Figure S1.** (A) Distribution of SNV/Indel variants of WES data. (Left) Bar-plot shows the number of variants per sample. The blue line represents the median number of variants; (Right) Box-plot shows the number of variants per sample across variant types. (B) Recurrently mutated gene list from WES data.
