# Supplementary material for: Genomic profile of MYCN non-amplified neuroblastoma and potential for immunotherapeutic strategies in neuroblastoma
Source: PubMed Central journal article supplement (PMC7653769; doi:10.1186/s12920-020-00819-5), 2020-11-10
Supplement: 12920_2020_819_MOESM2_ESM.pdf [file 12920_2020_819_MOESM2_ESM.pdf]

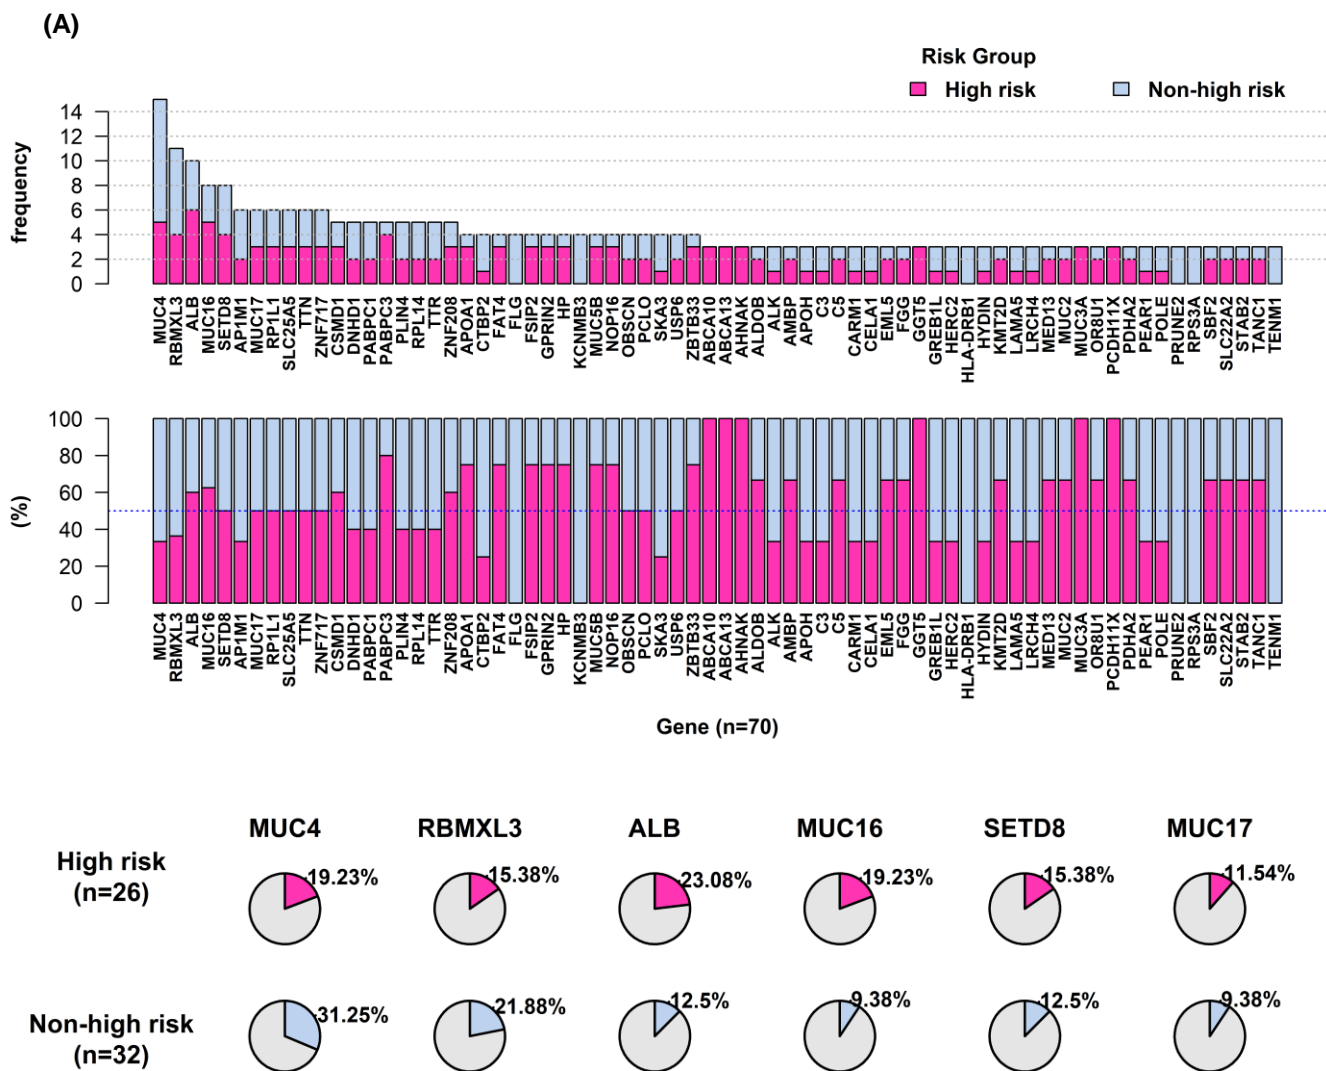

**Figure S2.** (A) The frequency of mutated genes in risk groups. The proportion of high/non-high risk groups is presented for each mutated gene to identify the association between mutation and risk group. Significant difference in the frequency of mutations between high and non-high risk group was not observed.

(B)

| Geneset Name                                                                                                               | WT        |               | MUT       |               | P-value |
|----------------------------------------------------------------------------------------------------------------------------|-----------|---------------|-----------|---------------|---------|
|                                                                                                                            | High risk | Non-high risk | High risk | Non-high risk |         |
| GO_ATPASE_ACTIVITY_COUPLED                                                                                                 | 5         | 22            | 21        | 10            | 0.00021 |
| GO_PROTEIN_MODIFICATION_BY_SMALL_PROTEIN_CONJUGATION_OR_REMOVAL                                                            | 0         | 12            | 26        | 20            | 0.00026 |
| GO_TRANSCRIPTIONAL_ACTIVATOR_ACTIVITY_RNA_POLYMERASE_II_CORE_PROMOTER_PROXIMAL_REGION_SEQUENCE_SPECIFIC_BINDING            | 12        | 29            | 14        | 3             | 0.00034 |
| GO_MITOCHONDRIAL_MATRIX                                                                                                    | 8         | 25            | 18        | 7             | 0.00046 |
| GO_REGULATION_OF_PROTEIN_MODIFICATION_BY_SMALL_PROTEIN_CONJUGATION_OR_REMOVAL                                              | 11        | 28            | 15        | 4             | 0.00053 |
| GO_POSITIVE_REGULATION_OF_PROTEIN_MODIFICATION_BY_SMALL_PROTEIN_CONJUGATION_OR_REMOVAL                                     | 14        | 30            | 12        | 2             | 0.00055 |
| GO_REGULATION_OF_MUSCLE_ADAPTATION                                                                                         | 18        | 32            | 8         | 0             | 0.00082 |
| GO_REGULATION_OF_SYSTEMIC_ARTERIAL_BLOOD_PRESSURE_BY_HORMONE                                                               | 18        | 32            | 8         | 0             | 0.00082 |
| GO_ENDOCRINE_PROCESS                                                                                                       | 18        | 32            | 8         | 0             | 0.00082 |
| GO_REGULATION_OF_SYSTEMIC_ARTERIAL_BLOOD_PRESSURE_MEDIATED_BY_A_CHEMICAL_SIGNAL                                            | 18        | 32            | 8         | 0             | 0.00082 |
| GO_ATPASE_ACTIVITY_COUPLED_TO_MOVEMENT_OF_SUBSTANCES                                                                       | 13        | 29            | 13        | 3             | 0.00090 |
| GO_RESPONSE_TO_WOUNDING                                                                                                    | 3         | 17            | 23        | 15            | 0.00100 |
| GO_TRANSCRIPTION_FROM_RNA_POLYMERASE_II_PROMOTER                                                                           | 3         | 17            | 23        | 15            | 0.00100 |
| GO_DEFENSE_RESPONSE_TO_OTHER_ORGANISM                                                                                      | 3         | 17            | 23        | 15            | 0.00100 |
| GO_REGULATION_OF_IMMUNE_EFFECTOR_PROCESS                                                                                   | 3         | 17            | 23        | 15            | 0.00100 |
| GO_TRANSCRIPTION_FACTOR_ACTIVITY_RNA_POLYMERASE_II_CORE_PROMOTER_PROXIMAL_REGION_SEQUENCE_SPECIFIC_BINDING                 | 10        | 26            | 16        | 6             | 0.00115 |
| GO_PROTEIN_UBIQUITINATION                                                                                                  | 2         | 15            | 24        | 17            | 0.00128 |
| GO_CELL_ACTIVATION                                                                                                         | 5         | 20            | 21        | 12            | 0.00131 |
| GO_TRANSCRIPTION_FACTOR_BINDING                                                                                            | 5         | 20            | 21        | 12            | 0.00131 |
| <b>GO_UNSATURATED_FATTY_ACID_METABOLIC_PROCESS</b>                                                                         | 16        | 31            | 10        | 1             | 0.00135 |
| <b>GO_FATTY_ACID_DERIVATIVE_METABOLIC_PROCESS</b>                                                                          | 16        | 31            | 10        | 1             | 0.00135 |
| GO_REGULATION_OF_DENDRITE_MORPHOGENESIS                                                                                    | 15        | 30            | 11        | 2             | 0.00143 |
| GO_TRANSCRIPTIONAL_ACTIVATOR_ACTIVITY_RNA_POLYMERASE_II_TRANSCRIPTION_REGULATORY_REGION_SEQUENCE_SPECIFIC_BINDING          | 11        | 27            | 15        | 5             | 0.00184 |
| GO_LIPID_BINDING                                                                                                           | 3         | 16            | 23        | 16            | 0.00218 |
| GO_EXCRETION                                                                                                               | 19        | 32            | 7         | 0             | 0.00219 |
| GO_POSITIVE_REGULATION_OF_HEART_GROWTH                                                                                     | 19        | 32            | 7         | 0             | 0.00219 |
| GO_POSITIVE_REGULATION_OF_TRANSCRIPTION_FROM_RNA_POLYMERASE_II_PROMOTER_IN_RESPONSE_TO_STRESS                              | 19        | 32            | 7         | 0             | 0.00219 |
| GO_POSITIVE_REGULATION_OF_TRANSCRIPTION_FROM_RNA_POLYMERASE_II_PROMOTER_INVOLVED_IN_CELLULAR_RESPONSE_TO_CHEMICAL_STIMULUS | 19        | 32            | 7         | 0             | 0.00219 |
| GO_POSITIVE_REGULATION_OF_ORGAN_GROWTH                                                                                     | 19        | 32            | 7         | 0             | 0.00219 |
| GO_REGULATION_OF_BLOOD_PRESSURE                                                                                            | 14        | 29            | 12        | 3             | 0.00223 |
| GO_B_CELL_ACTIVATION                                                                                                       | 14        | 29            | 12        | 3             | 0.00223 |
| <b>GO_NEGATIVE_REGULATION_OF_DNA_METABOLIC_PROCESS</b>                                                                     | 14        | 29            | 12        | 3             | 0.00223 |
| GO_REGULATION_OF_NEURAL_PRECURSOR_CELL_PROLIFERATION                                                                       | 14        | 29            | 12        | 3             | 0.00223 |
| GO_PURINE_NTP_DEPENDENT_HELICASE_ACTIVITY                                                                                  | 14        | 29            | 12        | 3             | 0.00223 |
| GO_CELLULAR_CATABOLIC_PROCESS                                                                                              | 0         | 9             | 26        | 23            | 0.00293 |
| <b>GO_MONOCARBOXYLIC_ACID_METABOLIC_PROCESS</b>                                                                            | 5         | 19            | 21        | 13            | 0.00301 |
| REACTOME_INTEGRIN_CELL_SURFACE_INTERACTIONS                                                                                | 10        | 25            | 16        | 7             | 0.00305 |
| GO_SYNAPSE_ORGANIZATION                                                                                                    | 10        | 25            | 16        | 7             | 0.00305 |
| GO_ALCOHOL_BINDING                                                                                                         | 13        | 28            | 13        | 4             | 0.00317 |
| <b>GO_FATTY_ACID_METABOLIC_PROCESS</b>                                                                                     | 9         | 24            | 17        | 8             | 0.00319 |
| GO_REGULATION_OF_DNA_TEMPLATED_TRANSCRIPTION_IN_RESPONSE_TO_STRESS                                                         | 17        | 31            | 9         | 1             | 0.00325 |
| GO_CELL_CELL_ADHESION_VIA_PLASMA_MEMBRANE_ADHESION_MOLECULES                                                               | 8         | 23            | 18        | 9             | 0.00327 |
| GO_REGULATION_OF_CELLULAR_COMPONENT_BIOGENESIS                                                                             | 1         | 12            | 25        | 20            | 0.00329 |
| GO_CORE_PROMOTER_PROXIMAL_REGION_DNA_BINDING                                                                               | 7         | 22            | 19        | 10            | 0.00330 |
| KEGG_BASAL_CELL_CARCINOMA                                                                                                  | 16        | 30            | 10        | 2             | 0.00350 |
| GO_CULLIN_RING_UBIQUITIN_LIGASE_COMPLEX                                                                                    | 16        | 30            | 10        | 2             | 0.00350 |
| GO_SENSORY_ORGAN_MORPHOGENESIS                                                                                             | 7         | 21            | 19        | 11            | 0.00423 |
| GO_REGULATION_OF_DENDRITE_DEVELOPMENT                                                                                      | 12        | 27            | 14        | 5             | 0.00423 |

**Figure S2.** (B) List of 48 pathways whose alteration is associated with risk groups. By categorizing mutation status in each pathway, the association between altered pathways and risk groups is examined. The significance of association was determined by Fisher's exact test.
