# Supplementary material for: Genomic profile of MYCN non-amplified neuroblastoma and potential for immunotherapeutic strategies in neuroblastoma
Source: PubMed Central journal article supplement (PMC7653769; doi:10.1186/s12920-020-00819-5), 2020-11-10
Supplement: 12920_2020_819_MOESM3_ESM.pdf [file 12920_2020_819_MOESM3_ESM.pdf]

(A)

| Recurrent Fusion | Target fusion junction sequence                                                                                                                                                                                                                                                                                                                                                                                                                                                                                                                                                                                                                                                                                   |
|------------------|-------------------------------------------------------------------------------------------------------------------------------------------------------------------------------------------------------------------------------------------------------------------------------------------------------------------------------------------------------------------------------------------------------------------------------------------------------------------------------------------------------------------------------------------------------------------------------------------------------------------------------------------------------------------------------------------------------------------|
| CCDC32-CBX3      | CTCAGATTCCAAATGAAAATGTTTGAGAGCGCTGACTCTACAGCCACAAGATCTGGCCAGGATCTCTGGGCTGAAATTTGTTCCCTGTCTGCCAAATCCTGAACAAGAAGATGGTGCCAACAATGCATTCTCAGACTCCTTTGTGGATTCTTGCCCTGAAGGTGAAGGCCAGAGGGAGGTGGCTGACTTTGTGTCCAGCCAGCTGTAAGCCTTGGGCTCCCTTGCA <b>AGGATT</b> CAGAAGT <b>GATT</b> AGCAT <b>CTCTAGCCATTTATTTAAAAATTTCCCTGACTTCGGATGTGGCTTGAGCTGTAG GCGCGGAGGGCCGGAGACGCTGCAGACCCGCGACCCGGAGCA</b> GCTCGGAGGCGGTGAATAATAGCTCTTCAAGTCTGCAATAAAAAATGGCCTCCAACAAAACATTGCAA AAAATGGGAAAAAACAGAATGGAAAGAGTAAAAAGTTGAAGAGGCAGAGCCTGAAGAATTTGTCGTGG AAAAAGTACTAGATCGACGTGTAGTGAATGGGAAAGTGAATATTTCTGAAGTGAAGGGATTACAGAT GCTGACAATACTGGGAACCTGAAGAAAATTTAGATTGTCCAGAATTGATTGAAGCGTTTCTTAACTCTCAG AAAGCTGGCAAAGAAAAAAGATGGTACAAAAAGAAAATC |
| SAMD5-SASH1      | CGGGAGCAGGACGCCAACGCCGCCGCTCTACTTCACGCTTGAGCCGCAGCCGGCGCCCCGGGC CGCCCCGCGACGCCGTCCCCACCGGCCGCCGGGGGAGCCGTGCGGCGGCCCGGCCAGGGCACCC GCGGGGACTCTCGCGCCACAGACCCGCCCGCCGAGCAGGGAGCTGGTGAGCTACCCCAAACCTGAA GCTGAAGATCATGATCAGGGATAAGCTCGTCCGTGACGGCATCC <b>ACTGAGCAAGCCCCGTA</b> CTCCCG <b>CAAGGACGGT</b> CACTGGGAAACATCGATGACCTGGCGCAGCAGTATGCAGATTATTACAACACCTGTTT CCGACGTGTGCGAGAGGATGGAGGAGCTGCGGAAACGGCGGTTTCCAGGACCTGGAAGTGGAGAA ACCCGATGCTAGCCCCACGTCACTTCAGCTGCGGTCCAGATCGAAGAGTCGTTGGCTTCTGTAGCGC CGTGTCAACCCAGAAGTGGAAAGAAAGAACCTCTTCATAAATCAAACCTCAGAAGACAGCTCTGTAGGA AAAGGAGACT                                                                                                                              |

(B)

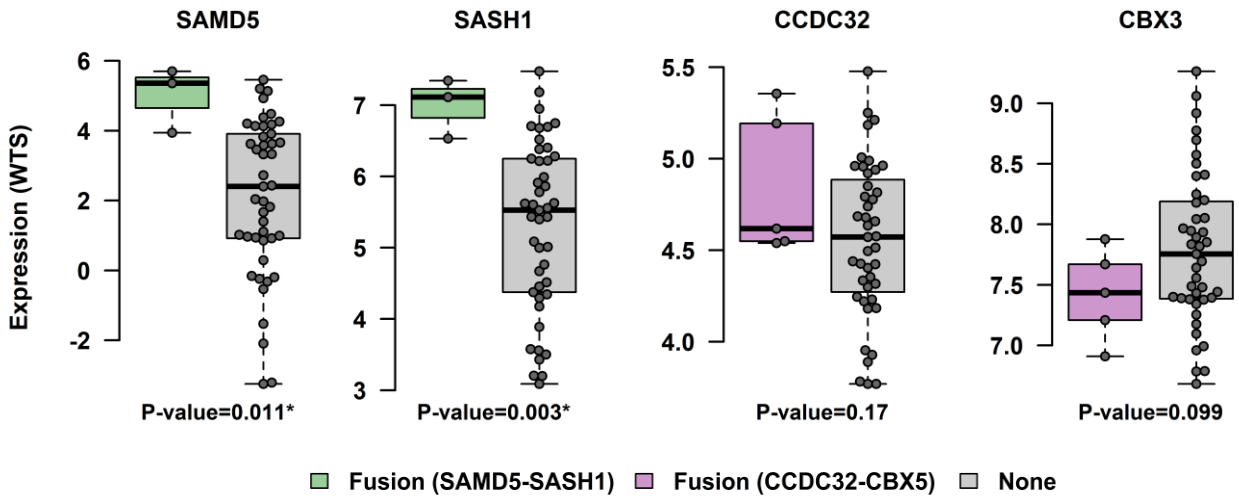

**Figure S3.** (A) The junction sequence of two recurrent fusions. (B) Expression profiles of genes having SMAD5-SASH1 or CCDC32-CBX3 fusion. Expression level of SASH1 and SAMD5 genes is higher in patients with SAMD5-SASH1 fusion.
