# Supplementary material for: Genomic profile of MYCN non-amplified neuroblastoma and potential for immunotherapeutic strategies in neuroblastoma
Source: PubMed Central journal article supplement (PMC7653769; doi:10.1186/s12920-020-00819-5), 2020-11-10
Supplement: 12920_2020_819_MOESM4_ESM.pdf [file 12920_2020_819_MOESM4_ESM.pdf]

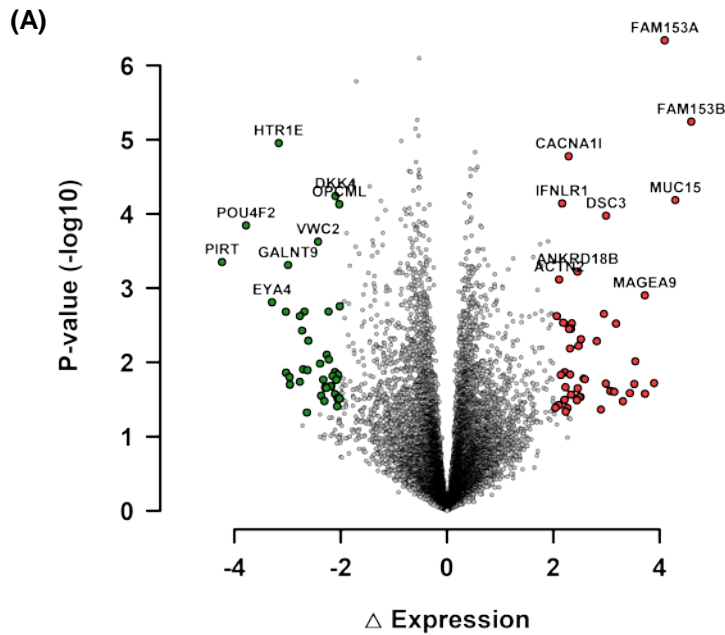

A total of 86 genes were significant. (red/green dot)  
 \* Threshold for significance:  $|\Delta \text{ Expression}| > 2$  &  $P\text{-value} < 0.05$

(B)

| Class                       | Gene      | High risk (avg expr.) | Non-high risk (avg expr.) | diff.expr | T-stat. | P-value | P-value (FDR) |
|-----------------------------|-----------|-----------------------|---------------------------|-----------|---------|---------|---------------|
| Overexpressed in High risk  | FAM153A   | 1.780                 | -2.318                    | 4.098     | 6.413   | 0.000   | <b>0.006</b>  |
|                             | FAM153B   | 1.677                 | -2.924                    | 4.601     | 5.681   | 0.000   | <b>0.018</b>  |
|                             | CACNA11   | 1.577                 | -0.715                    | 2.292     | 4.889   | 0.000   | <b>0.023</b>  |
|                             | MUC15     | 0.632                 | -3.666                    | 4.298     | 4.778   | 0.000   | <b>0.032</b>  |
|                             | IFNLR1    | 1.613                 | -0.554                    | 2.167     | 4.743   | 0.000   | <b>0.032</b>  |
|                             | DSC3      | 0.446                 | -2.548                    | 2.994     | 4.276   | 0.000   | <b>0.037</b>  |
|                             | ANKRD18B  | -1.714                | -4.172                    | 2.459     | 3.998   | 0.001   | 0.070         |
|                             | ACTN2     | 4.811                 | 2.699                     | 2.113     | 3.637   | 0.001   | 0.077         |
|                             | MAGEA9    | 0.847                 | -2.876                    | 3.723     | 3.693   | 0.001   | 0.093         |
|                             | MAGEC1    | -1.120                | -4.075                    | 2.954     | 3.413   | 0.002   | 0.115         |
|                             | PPP4R4    | 1.226                 | -0.842                    | 2.068     | 3.221   | 0.002   | 0.117         |
|                             | SLC5A12   | 0.328                 | -1.861                    | 2.189     | 3.332   | 0.003   | 0.129         |
|                             | CRB2      | -0.162                | -2.513                    | 2.352     | 3.357   | 0.003   | 0.129         |
|                             | POTEM     | -2.020                | -5.204                    | 3.184     | 3.484   | 0.003   | 0.129         |
|                             | TRPC5     | -0.531                | -2.867                    | 2.336     | 3.146   | 0.004   | 0.138         |
|                             | LGSN      | -0.421                | -2.720                    | 2.299     | 3.210   | 0.004   | 0.138         |
|                             | ALX3      | -1.354                | -3.878                    | 2.524     | 3.090   | 0.005   | 0.161         |
|                             | SLCO1A2   | 0.773                 | -2.048                    | 2.821     | 3.077   | 0.005   | 0.166         |
|                             | OR4N4     | -2.959                | -5.437                    | 2.478     | 3.154   | 0.006   | 0.176         |
|                             | SAA1      | -0.878                | -3.193                    | 2.316     | 2.922   | 0.007   | 0.181         |
|                             | MAGEA4    | -0.256                | -3.801                    | 3.545     | 2.858   | 0.010   | 0.216         |
|                             | NXF2B     | 0.226                 | -1.991                    | 2.217     | 2.588   | 0.014   | 0.249         |
|                             | CXCR5     | 1.524                 | -0.795                    | 2.320     | 2.565   | 0.015   | 0.255         |
|                             | CCDC144NL | 1.252                 | -0.891                    | 2.143     | 2.617   | 0.015   | 0.255         |
|                             | TUBA3C    | -2.624                | -5.197                    | 2.573     | 2.670   | 0.017   | 0.266         |
|                             | WDR72     | -1.554                | -4.152                    | 2.598     | 2.633   | 0.017   | 0.266         |
|                             | DDX3Y     | 3.472                 | -0.426                    | 3.898     | 2.466   | 0.019   | 0.281         |
|                             | MAGEA11   | -0.376                | -3.367                    | 2.991     | 2.536   | 0.019   | 0.281         |
|                             | KDM5D     | 2.707                 | -0.816                    | 3.523     | 2.459   | 0.020   | 0.283         |
|                             | FGF10     | 1.859                 | -0.371                    | 2.229     | 2.406   | 0.022   | 0.293         |
|                             | NAA11     | -3.193                | -5.655                    | 2.461     | 2.538   | 0.023   | 0.298         |
|                             | MAGEA10   | 1.807                 | -1.270                    | 3.077     | 2.371   | 0.025   | 0.306         |
|                             | UTY       | 1.430                 | -1.718                    | 3.148     | 2.350   | 0.025   | 0.308         |
|                             | USP9Y     | 2.468                 | -0.977                    | 3.445     | 2.331   | 0.026   | 0.315         |
|                             | RPS4Y1    | 4.865                 | 1.135                     | 3.730     | 2.318   | 0.027   | 0.316         |
|                             | XAGE1A    | -2.755                | -5.090                    | 2.335     | 2.428   | 0.027   | 0.320         |
|                             | XAGE1D    | -2.199                | -4.714                    | 2.515     | 2.389   | 0.029   | 0.327         |
|                             | XAGE1E    | -2.597                | -5.090                    | 2.493     | 2.390   | 0.030   | 0.328         |
|                             | CA1       | -0.849                | -3.064                    | 2.215     | 2.280   | 0.032   | 0.335         |
|                             | XAGE1C    | -2.595                | -5.040                    | 2.446     | 2.343   | 0.032   | 0.337         |
|                             | EIF1AY    | 2.196                 | -1.116                    | 3.312     | 2.217   | 0.034   | 0.341         |
|                             | IGLL5     | 3.693                 | 1.590                     | 2.103     | 2.204   | 0.038   | 0.354         |
|                             | NMU       | -1.607                | -3.649                    | 2.042     | 2.182   | 0.041   | 0.365         |
|                             | XAGE1B    | -2.386                | -4.656                    | 2.270     | 2.218   | 0.041   | 0.366         |
|                             | ZFY       | 1.430                 | -1.469                    | 2.899     | 2.105   | 0.043   | 0.374         |
|                             | MAGEC2    | -1.671                | -3.907                    | 2.235     | 2.118   | 0.046   | 0.383         |
| Underexpressed in High risk | HTR1E     | -3.903                | -0.737                    | -3.166    | -5.212  | 0.000   | <b>0.020</b>  |
|                             | DKK4      | -4.904                | -2.803                    | -2.101    | -4.434  | 0.000   | <b>0.030</b>  |
|                             | OPCML     | -0.608                | -1.417                    | -2.025    | -4.670  | 0.000   | <b>0.032</b>  |
|                             | POU4F2    | -3.866                | -0.083                    | -3.783    | -4.271  | 0.000   | <b>0.040</b>  |
|                             | VWC2      | -4.768                | -2.343                    | -2.425    | -3.988  | 0.000   | <b>0.050</b>  |
|                             | PIRT      | 1.015                 | 5.246                     | -4.231    | -4.063  | 0.000   | 0.068         |
|                             | GALNT9    | -2.191                | 0.799                     | -2.989    | -3.988  | 0.000   | 0.068         |
|                             | EYA4      | -1.373                | 1.918                     | -3.292    | -3.454  | 0.002   | 0.100         |
|                             | ERBB4     | -2.470                | -0.452                    | -2.018    | -3.418  | 0.002   | 0.104         |
|                             | SLC17A6   | -4.305                | -2.075                    | -2.229    | -3.265  | 0.002   | 0.113         |
|                             | GALR1     | -3.692                | -1.009                    | -2.683    | -3.411  | 0.002   | 0.113         |
|                             | SPHKAP    | -2.521                | 0.512                     | -3.033    | -3.418  | 0.002   | 0.113         |
|                             | SLITRK3   | -3.480                | -0.714                    | -2.766    | -3.306  | 0.002   | 0.117         |
|                             | CRABP1    | -1.797                | 0.929                     | -2.726    | -3.071  | 0.004   | 0.141         |
|                             | EYA1      | 0.429                 | 3.036                     | -2.607    | -3.042  | 0.005   | 0.165         |
|                             | NLGN1     | 0.082                 | 2.344                     | -2.262    | -2.960  | 0.008   | 0.200         |
|                             | DIO3      | -1.368                | 0.854                     | -2.222    | -2.778  | 0.009   | 0.212         |
|                             | CSAG1     | -3.097                | -0.710                    | -2.387    | -2.784  | 0.010   | 0.222         |
|                             | FABP7     | -1.346                | 1.360                     | -2.705    | -2.726  | 0.012   | 0.242         |
|                             | NELL1     | -2.484                | 0.142                     | -2.626    | -2.715  | 0.013   | 0.245         |
| DGKB                        | 1.760     | 3.869                 | -2.109                    | -2.719    | 0.014   | 0.249   |               |
| ADCYAP1                     | 2.578     | 5.604                 | -3.026                    | -2.614    | 0.014   | 0.251   |               |
| PRND                        | -0.032    | 2.017                 | -2.049                    | -2.628    | 0.015   | 0.255   |               |
| INSM1                       | -0.058    | 2.094                 | -2.152                    | -2.530    | 0.015   | 0.259   |               |
| CACNG7                      | -1.230    | 1.732                 | -2.962                    | -2.592    | 0.016   | 0.261   |               |
| HOXC10                      | -1.062    | 1.265                 | -2.326                    | -2.562    | 0.017   | 0.267   |               |
| TMEFF2                      | 1.963     | 4.041                 | -2.078                    | -2.551    | 0.017   | 0.268   |               |
| SLC5A7                      | -2.869    | -0.101                | -2.768                    | -2.483    | 0.018   | 0.276   |               |
| DLK1                        | 1.573     | 4.527                 | -2.954                    | -2.505    | 0.020   | 0.286   |               |
| ARHGDI3                     | 2.421     | 4.598                 | -2.177                    | -2.515    | 0.021   | 0.289   |               |
| MAGEA2B                     | -4.671    | -2.477                | -2.194                    | -2.424    | 0.021   | 0.289   |               |
| SPOCK3                      | 1.061     | 3.353                 | -2.292                    | -2.461    | 0.022   | 0.294   |               |
| MIA                         | 1.669     | 3.938                 | -2.269                    | -2.409    | 0.022   | 0.295   |               |
| CLDN19                      | -3.622    | -1.514                | -2.108                    | -2.302    | 0.027   | 0.318   |               |
| CGA                         | -3.052    | -0.683                | -2.369                    | -2.285    | 0.028   | 0.323   |               |
| SV2C                        | 1.154     | 3.213                 | -2.058                    | -2.303    | 0.031   | 0.331   |               |
| GABRG1                      | -1.989    | 0.035                 | -2.024                    | -2.273    | 0.031   | 0.331   |               |
| NKAIN4                      | -1.127    | 1.179                 | -2.306                    | -2.265    | 0.033   | 0.341   |               |
| CDH10                       | -0.579    | 1.488                 | -2.067                    | -2.177    | 0.039   | 0.360   |               |
| FOXD3                       | 0.190     | 2.827                 | -2.637                    | -2.089    | 0.048   | 0.386   |               |

**Figure S4.** (A) Volcano plot representing the result of DEG ( $n = 86$ ). Red and green dots indicate significantly over or under expressed genes, respectively, in high risk group. (B) List of DEGs ( $n = 86$ ). While 46 genes were overexpressed, 40 genes were under-expressed, in high risk group. The significance was determined by two-group  $T$ -test ( $P\text{-value} < 0.05$ ) and difference of average expression between risk-groups  $> 2$ .

(C)

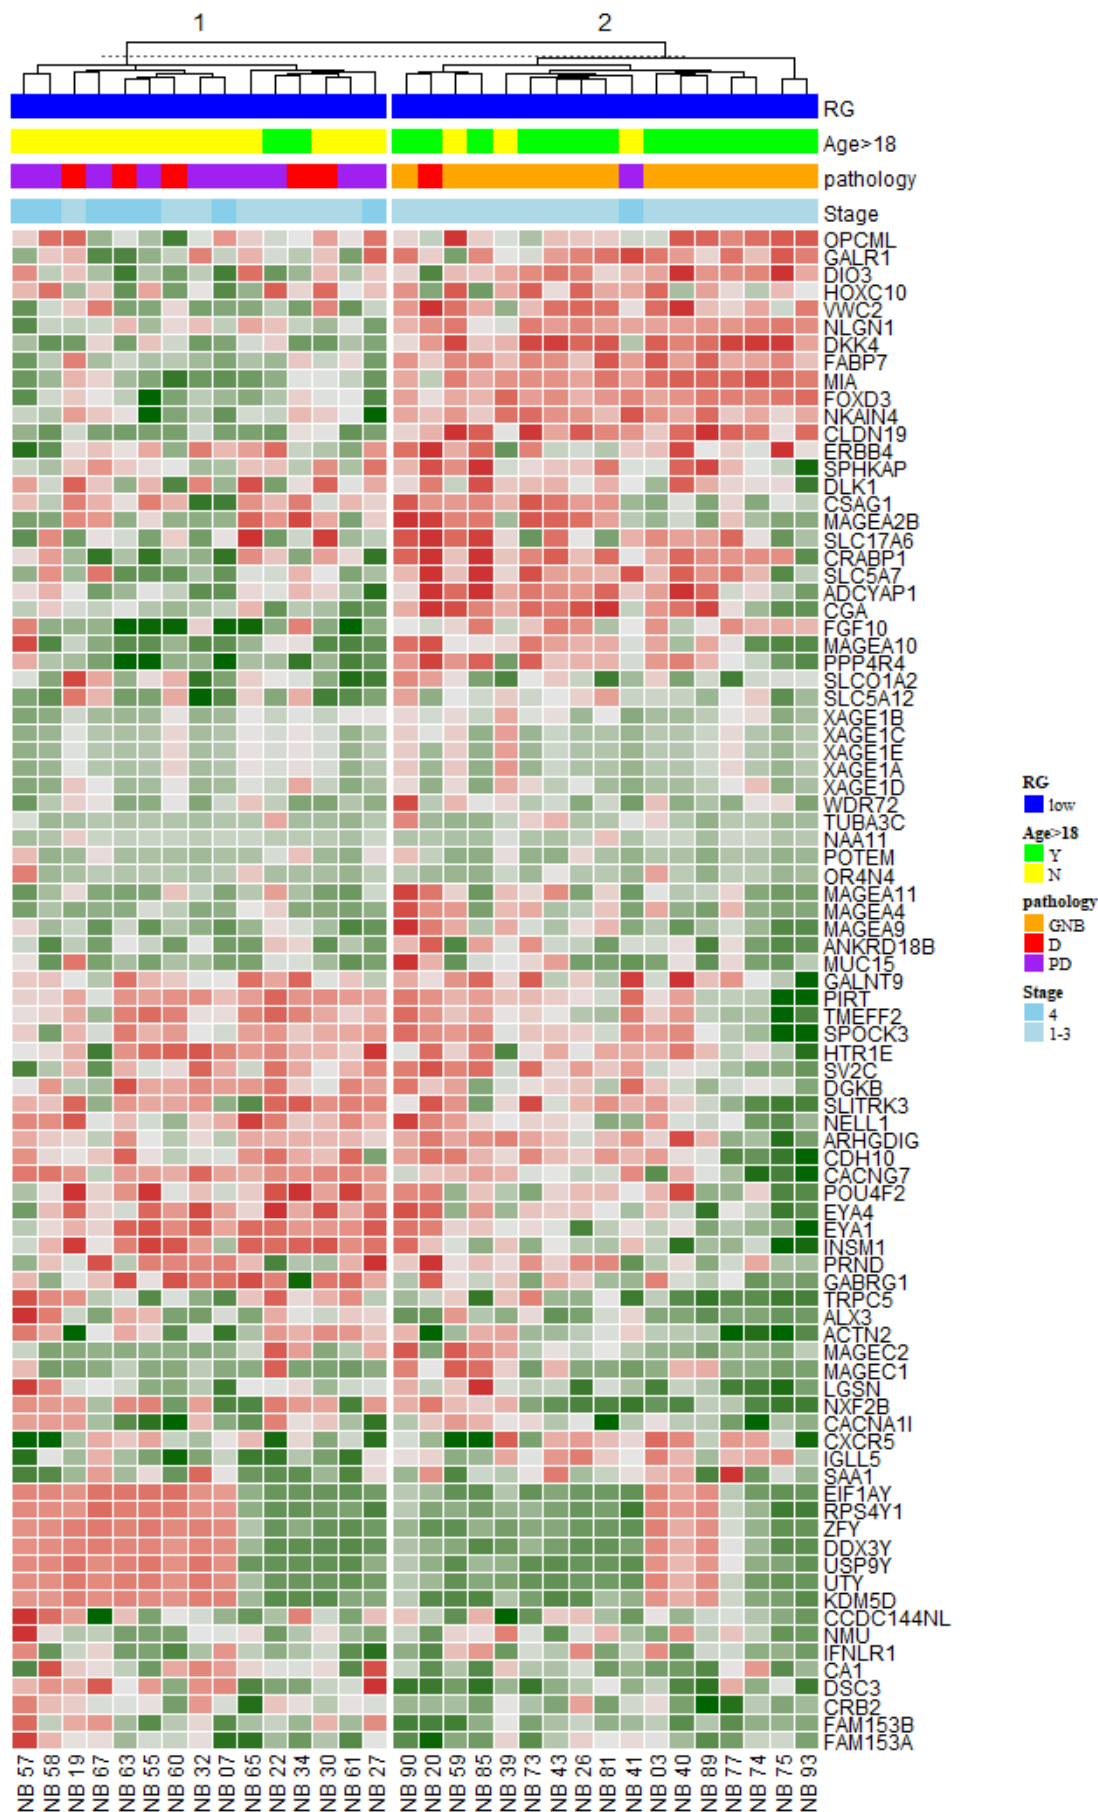

**Figure S4.** (C) Unsupervised clustering of non-high-risk group. Unsupervised clustering of non-high-risk group revealed two distinct subgroups showing clear differences in age, pathologic differentiation and stage.
