# Supplementary material for: Genomic profile of MYCN non-amplified neuroblastoma and potential for immunotherapeutic strategies in neuroblastoma
Source: PubMed Central journal article supplement (PMC7653769; doi:10.1186/s12920-020-00819-5), 2020-11-10
Supplement: 12920_2020_819_MOESM5_ESM.pdf [file 12920_2020_819_MOESM5_ESM.pdf]

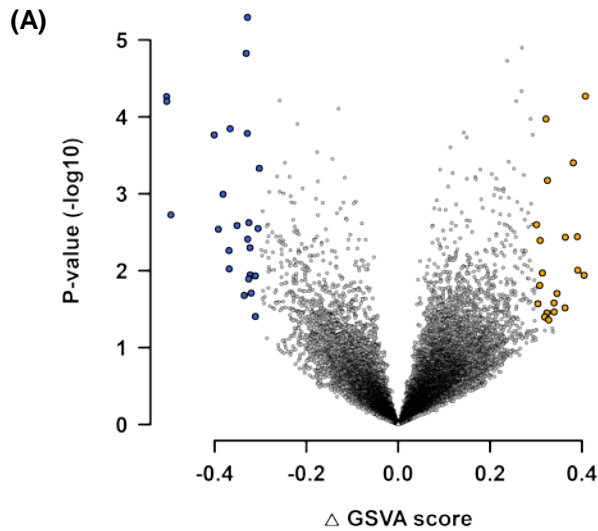

A total of 44 genesets were significant. (orange/blue dot)  
 \* Threshold for significance:  $|\Delta \text{GSVA score}| > 0.3$  &  $P\text{-value} < 0.05$

**(B)**

| Class                                    | Gene set name                                                   | High risk (avg GSVa score) | Non-high risk (avg GSVa score) | diff.score | T-stat. | P-value | FDR   |
|------------------------------------------|-----------------------------------------------------------------|----------------------------|--------------------------------|------------|---------|---------|-------|
| <b>Activated</b><br>In high risk group   | CROONQUIST_STROMAL_STIMULATION_DN                               | 0.278                      | -0.130                         | 0.408      | 4.604   | 0.000   | 0.112 |
|                                          | INAMURA_LUNG_CANCER_SCC_SUBTYPES_UP                             | 0.175                      | -0.147                         | 0.322      | 4.346   | 0.000   | 0.147 |
|                                          | chr9p                                                           | 0.263                      | -0.118                         | 0.381      | 3.866   | 0.000   | 0.271 |
|                                          | BALLIF_DEVELOPMENTAL_DISABILITY_P16_P12_DELETION                | 0.214                      | -0.111                         | 0.325      | 3.814   | 0.001   | 0.292 |
|                                          | GO_POLY_A_MRNA_EXPORT_FROM_NUCLEUS                              | 0.132                      | -0.170                         | 0.301      | 3.321   | 0.003   | 0.452 |
|                                          | INAMURA_LUNG_CANCER_SCC_SUBTYPES_DN                             | 0.251                      | -0.139                         | 0.390      | 3.095   | 0.004   | 0.499 |
|                                          | chr19p                                                          | 0.206                      | -0.158                         | 0.364      | 3.122   | 0.004   | 0.499 |
|                                          | BIOCARTA_TALL1_PATHWAY                                          | 0.215                      | -0.094                         | 0.309      | 3.095   | 0.004   | 0.499 |
|                                          | BRUNEAU_SEPTATION_ATRIAL                                        | 0.272                      | -0.119                         | 0.391      | 2.722   | 0.010   | 0.609 |
|                                          | GO_REGULATION_OF_MHC_CLASS_II_BIOSYNTHETIC_PROCESS              | 0.220                      | -0.094                         | 0.314      | 2.759   | 0.011   | 0.627 |
|                                          | chr18p                                                          | 0.297                      | -0.108                         | 0.405      | 2.682   | 0.011   | 0.635 |
|                                          | GO_MRNA_CLEAVAGE_AND_POLYADENYLATION_SPECIFICITY_FACTOR_COMPLEX | 0.111                      | -0.198                         | 0.308      | 2.595   | 0.016   | 0.690 |
|                                          | LI_WILMS_TUMOR_ANAPLASTIC_DN                                    | 0.251                      | -0.095                         | 0.346      | 2.471   | 0.020   | 0.703 |
|                                          | GO_REGULATION_OF_INTERFERON_GAMMA_SECRETION                     | 0.239                      | -0.100                         | 0.340      | 2.382   | 0.026   | 0.734 |
|                                          | REACTOME_PROCESSING_OF_INTRONLESS_PRE_MRNAs                     | 0.093                      | -0.211                         | 0.304      | 2.349   | 0.027   | 0.735 |
|                                          | RUNNE_GENDER_EFFECT_UP                                          | 0.251                      | -0.112                         | 0.364      | 2.261   | 0.031   | 0.748 |
|                                          | FINETTI_BREAST_CANCER_KINOME_GREEN                              | 0.259                      | -0.081                         | 0.340      | 2.239   | 0.035   | 0.750 |
|                                          | MODULE_73                                                       | 0.241                      | -0.083                         | 0.324      | 2.221   | 0.036   | 0.751 |
|                                          | BASSO_HAIRY_CELL_LEUKEMIA_DN                                    | 0.188                      | -0.131                         | 0.319      | 2.150   | 0.040   | 0.760 |
|                                          | chr9q11                                                         | 0.231                      | -0.097                         | 0.328      | 2.090   | 0.044   | 0.763 |
| <b>Inactivated</b><br>In high risk group | chr7p21                                                         | -0.238                     | 0.090                          | -0.328     | -5.267  | 0.000   | 0.083 |
|                                          | chr17p12                                                        | -0.222                     | 0.109                          | -0.331     | -4.941  | 0.000   | 0.083 |
|                                          | GO_G_PROTEIN_COUPLED_PHOTORECEPTOR_ACTIVITY                     | -0.303                     | 0.201                          | -0.504     | -4.605  | 0.000   | 0.112 |
|                                          | HESSON_TUMOR_SUPPRESSOR_CLUSTER_3P21_3                          | -0.340                     | 0.164                          | -0.504     | -4.708  | 0.000   | 0.112 |
|                                          | TESAR_ALK_TARGETS_EPISC_3D_UP                                   | -0.249                     | 0.117                          | -0.366     | -4.322  | 0.000   | 0.161 |
|                                          | chr6q13                                                         | -0.179                     | 0.150                          | -0.328     | -4.268  | 0.000   | 0.161 |
|                                          | chr11q25                                                        | -0.286                     | 0.114                          | -0.400     | -4.311  | 0.000   | 0.161 |
|                                          | GO_GANGLIOSIDE_BIOSYNTHETIC_PROCESS                             | -0.174                     | 0.128                          | -0.302     | -4.083  | 0.000   | 0.288 |
|                                          | GO_KETONE_BODY_METABOLIC_PROCESS                                | -0.259                     | 0.122                          | -0.381     | -3.579  | 0.001   | 0.348 |
|                                          | REACTOME_OPSINS                                                 | -0.278                     | 0.217                          | -0.495     | -3.383  | 0.002   | 0.406 |
|                                          | MIKHAYLOVA_OXIDATIVE_STRESS_RESPONSE_VIA_VHL_UP                 | -0.218                     | 0.107                          | -0.325     | -3.228  | 0.002   | 0.453 |
|                                          | NIKOLSKY_BREAST_CANCER_17P11_AMPLICON                           | -0.208                     | 0.142                          | -0.351     | -3.302  | 0.003   | 0.453 |
|                                          | GO_PREPULSE_INHIBITION                                          | -0.154                     | 0.152                          | -0.305     | -3.300  | 0.003   | 0.467 |
|                                          | VANDESLUIS_NORMAL_EMBRYOS_UP                                    | -0.264                     | 0.128                          | -0.391     | -3.193  | 0.003   | 0.467 |
|                                          | GO_INTRACILIARY_TRANSPORT_PARTICLE_B                            | -0.220                     | 0.107                          | -0.327     | -3.154  | 0.004   | 0.499 |
|                                          | SCHAEFFER_PROSTATE_DEVELOPMENT_AND_CANCER_BOX5_DN               | -0.191                     | 0.131                          | -0.323     | -3.004  | 0.005   | 0.534 |
|                                          | chr6q26                                                         | -0.189                     | 0.179                          | -0.368     | -2.984  | 0.006   | 0.534 |
|                                          | REACTOME_MITOCHONDRIAL_FATTY_ACID_BETA_OXIDATION                | -0.232                     | 0.136                          | -0.368     | -2.777  | 0.010   | 0.601 |
|                                          | CASTELLANO_HRAS_TARGETS_UP                                      | -0.238                     | 0.085                          | -0.322     | -2.663  | 0.011   | 0.634 |
|                                          | GO_MEMBRANE_ASSEMBLY                                            | -0.155                     | 0.155                          | -0.311     | -2.716  | 0.012   | 0.640 |
| MODULE_101                               | -0.223                                                          | 0.102                      | -0.325                         | -2.629     | 0.013   | 0.656   |       |
| GO_CELLULAR_RESPONSE_TO_NITROGEN_LEVELS  | -0.111                                                          | 0.209                      | -0.320                         | -2.466     | 0.020   | 0.702   |       |
| CLIMENT_BREAST_CANCER_COPY_NUMBER_DN     | -0.156                                                          | 0.179                      | -0.335                         | -2.473     | 0.021   | 0.714   |       |
| CHEN_HOXA5_TARGETS_6HR_DN                | -0.245                                                          | 0.066                      | -0.311                         | -2.155     | 0.040   | 0.757   |       |

**Figure S5.** (A) Volcano plot representing the result of GSVa. Orange and blue dots indicate significantly activated and inactivated gene-sets, respectively, in high risk group. (B) Among 17,810 gene sets from MsigDB, a total of 44 gene sets showed significant association with the risk group. The significance was determined by two-group *T*-test ( $P\text{-value} < 0.05$ ) and difference of average GSVa score between risk-groups  $> 0.3$ .

**(C)**

| Class                    | Gene set name                                                   | High risk<br>(avg. GSVA<br>score) | Non-high risk<br>(avg. GSVA<br>score) | diff.score | T-stat. | P-value |
|--------------------------|-----------------------------------------------------------------|-----------------------------------|---------------------------------------|------------|---------|---------|
| Activated in high risk   | GO_POLY_A_MRNA_EXPORT_FROM_NUCLEUS                              | 0.132                             | -0.170                                | 0.301      | 3.321   | 0.003   |
|                          | REACTOME_PROCESSING_OF_INTRONLESS_PRE_MRNAS                     | 0.093                             | -0.211                                | 0.304      | 2.349   | 0.027   |
|                          | GO_MRNA_CLEAVAGE_AND_POLYADENYLATION_SPECIFICITY_FACTOR_COMPLEX | 0.111                             | -0.198                                | 0.308      | 2.595   | 0.016   |
|                          | BIOCARTA_TALL1_PATHWAY                                          | 0.215                             | -0.094                                | 0.309      | 3.095   | 0.004   |
|                          | GO_REGULATION_OF_MHC_CLASS_II_BIOSYNTHETIC_PROCESS              | 0.220                             | -0.094                                | 0.314      | 2.759   | 0.011   |
|                          | GO_REGULATION_OF_INTERFERON_GAMMA_SECRETION                     | 0.239                             | -0.100                                | 0.340      | 2.382   | 0.026   |
| Inactivated in high risk | GO_G_PROTEIN_COUPLED_PHOTORECEPTOR_ACTIVITY                     | -0.303                            | 0.201                                 | -0.504     | -4.605  | 0.000   |
|                          | REACTOME_OPSINS                                                 | -0.278                            | 0.217                                 | -0.495     | -3.383  | 0.002   |
|                          | GO_KETONE_BODY_METABOLIC_PROCESS                                | -0.259                            | 0.122                                 | -0.381     | -3.579  | 0.001   |
|                          | REACTOME_MITOCHONDRIAL_FATTY_ACID_BETA_OXIDATION                | -0.232                            | 0.136                                 | -0.368     | -2.777  | 0.010   |
|                          | GO_INTRACILIARY_TRANSPORT_PARTICLE_B                            | -0.220                            | 0.107                                 | -0.327     | -3.154  | 0.004   |
|                          | GO_CELLULAR_RESPONSE_TO_NITROGEN_LEVELS                         | -0.111                            | 0.209                                 | -0.320     | -2.466  | 0.020   |
|                          | GO_MEMBRANE_ASSEMBLY                                            | -0.155                            | 0.155                                 | -0.311     | -2.716  | 0.012   |
|                          | GO_PREPULSE_INHIBITION                                          | -0.154                            | 0.152                                 | -0.305     | -3.300  | 0.003   |
|                          | GO_GANGLIOSIDE_BIOSYNTHETIC_PROCESS                             | -0.174                            | 0.128                                 | -0.302     | -4.083  | 0.000   |

**(D)**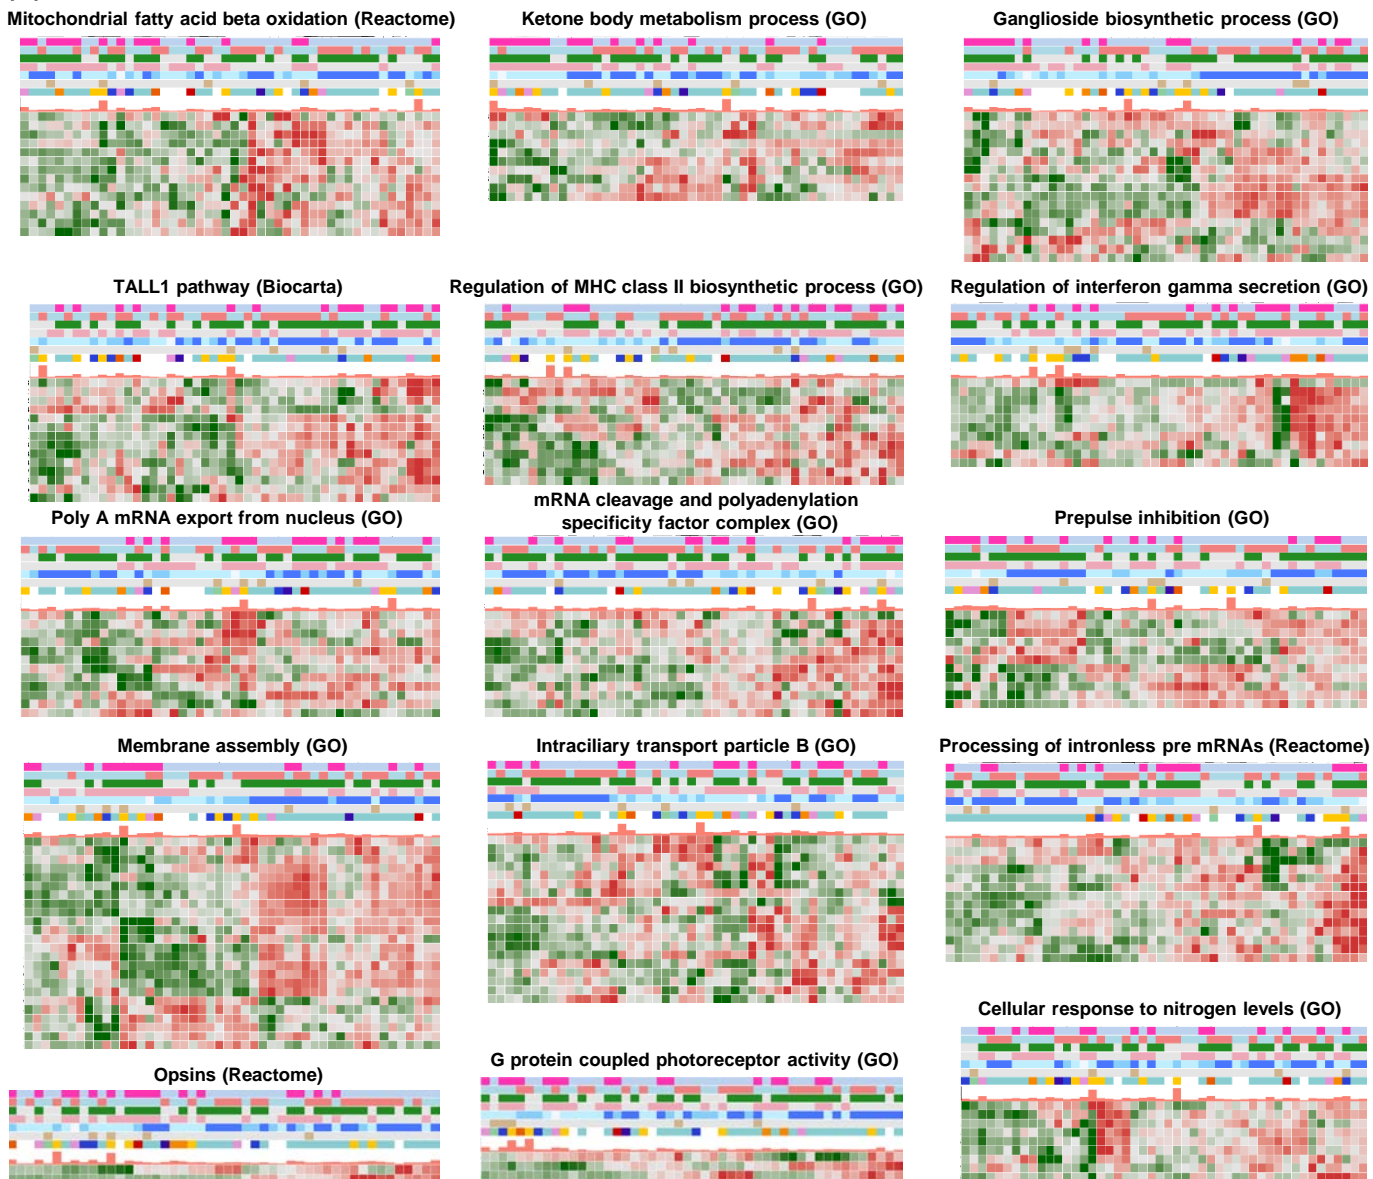

**Figure S5.** (C) The canonical pathways ( $n = 15$ ) that were significantly associated with risk groups were obtained from REACTOME, BIOCARTA, KEGG and GO databases. None of pathways were significant after adjusting  $P$ -values with FDR. (D) Gene expression profiles of the pathways showing significant association to risk groups.

(E)

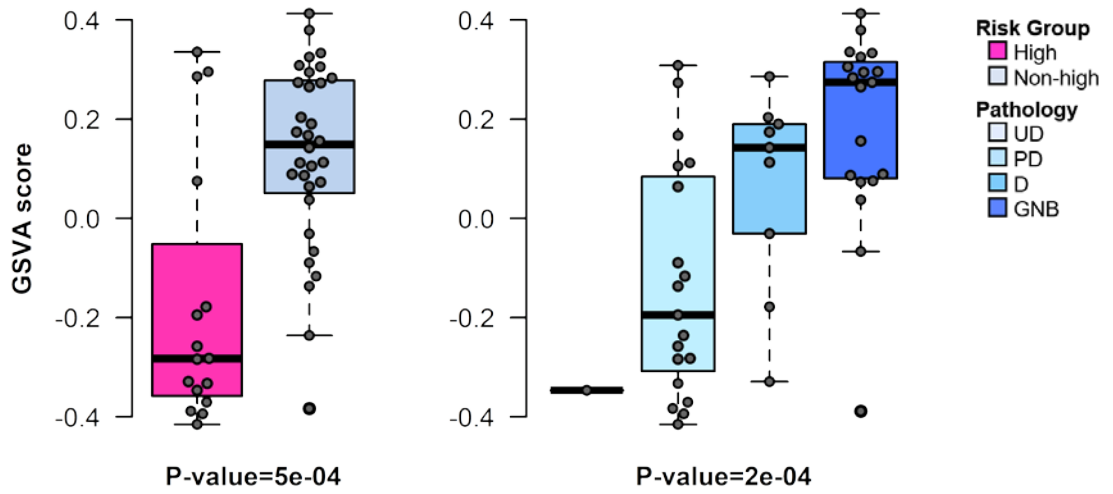

**Figure S5.** (E) The association of GSVA score of ganglioside biosynthesis pathway with risk-group (left) and pathology (right).
